# Supplementary material for: Quest for the Molecular Basis of Improved Selective Toxicity of All-Trans Isomers of Aromatic Heptaene Macrolide Antifungal Antibiotics
Source: MDPI journal article supplement (doi:10.3390/ijms221810108), 2021-09-18
Supplement: s1 [file s1]

## Supplementary materials

**Figures S1A-F.** HPLC-DAD-ESIMS chromatograms of CndD, ParA, ParB, isoCndD, isoParA and isoParB

**Figure S1A**

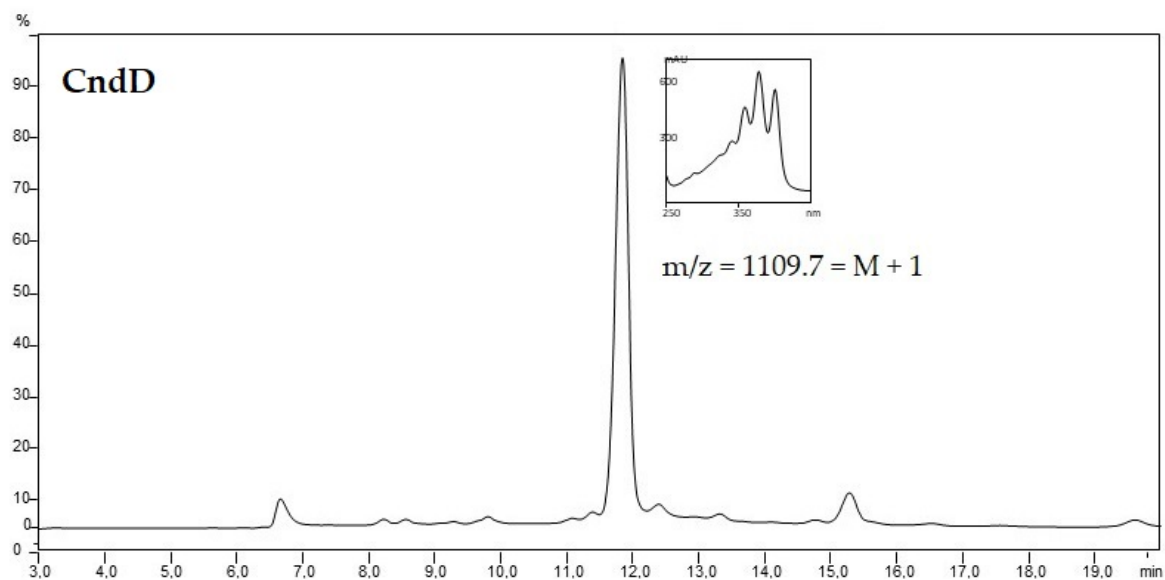

**HPLC-DAD-ESIMS chromatogram of Candidicin D sample.**

Chromatographic conditions: column Luna 100 C18(2), (150 mm × 4.6 mm, 5 μm). Mobile phase composition: 38% acetonitrile/ 62% ammonium acetate buffer (5.5 mmol, pH = 4.5), v/v; at a flow rate of 1 mL/min; inj. volume = 10 μL. Detection at 378 nm, room temperature.

**Figure S1B**

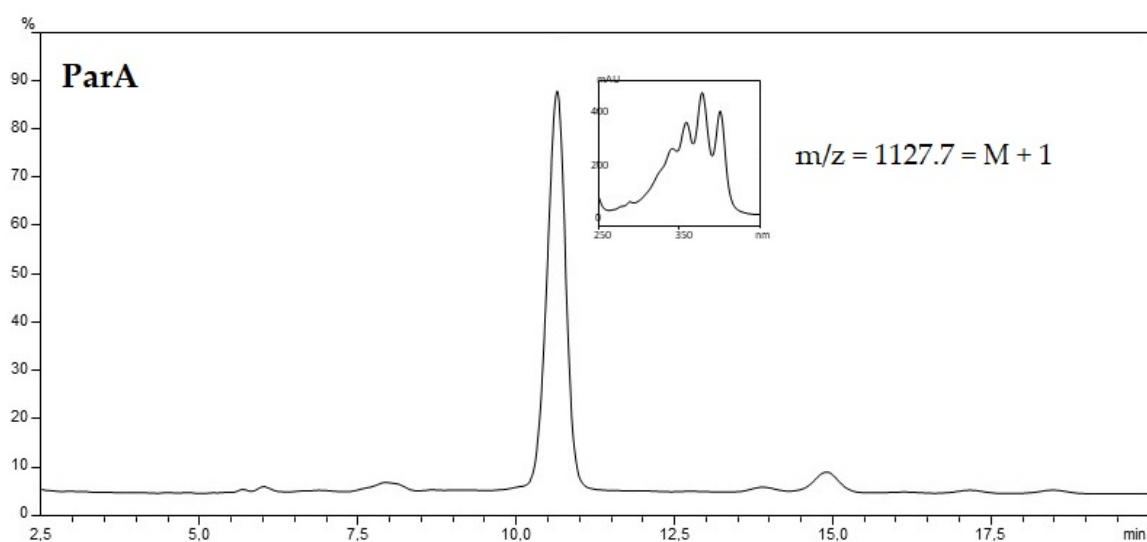

**HPLC-DAD-ESIMS chromatogram of Partricin A sample.**

Chromatographic conditions: column Luna 100 C18(2), (150 mm × 4.6 mm, 5 μm). Mobile phase composition: 38% acetonitrile/ 62% ammonium acetate buffer (5.5 mmol, pH = 4.5), v/v; at a flow rate of 1 mL/min; inj. volume = 10 μL. Detection at 378 nm, room temperature.

**Figure S1C**

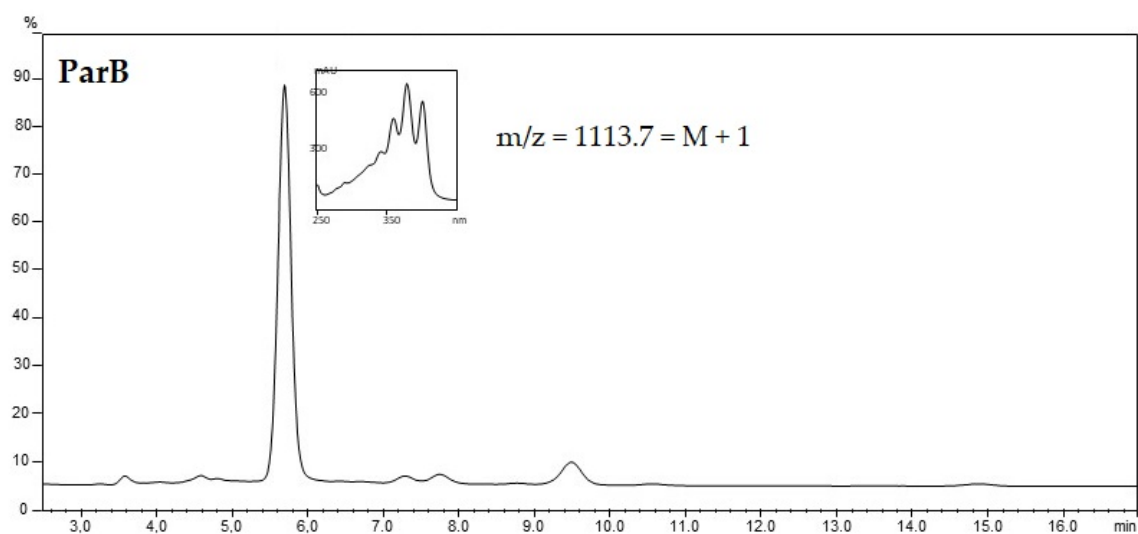

**HPLC-DAD-ESIMS chromatogram of Partricin B sample.**

Chromatographic conditions: column Luna 100 C18(2), (150 mm × 4.6 mm, 5 μm). Mobile phase composition: 38% acetonitrile/ 62% ammonium acetate buffer (5.5 mmol, pH = 4.5), v/v; at a flow rate of 1 mL/min; inj. volume = 10 μL. Detection at 378 nm, room temperature.

**Figure S1D**

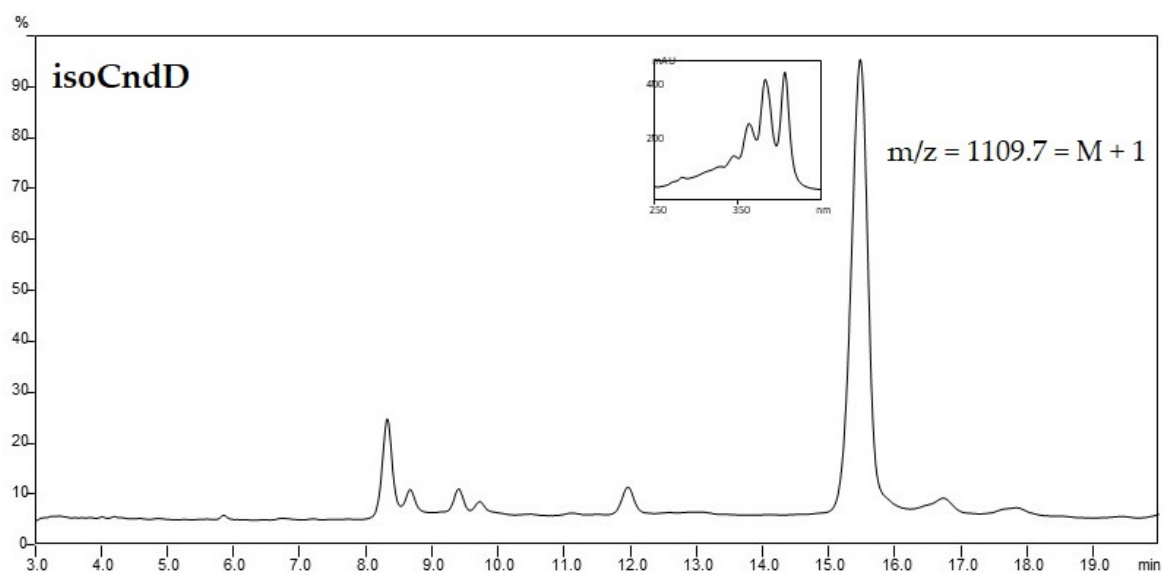

**HPLC-DAD-ESIMS chromatogram of isoCandicidin D sample.**

Chromatographic conditions: column Luna 100 C18(2), (150 mm × 4.6 mm, 5 μm). Mobile phase composition: 38% acetonitrile/ 62% ammonium acetate buffer (5.5 mmol, pH = 4.5), v/v; at a flow rate of 1 mL/min; inj. volume = 10 μL. Detection at 378 nm, room temperature.

**Figure S1E**

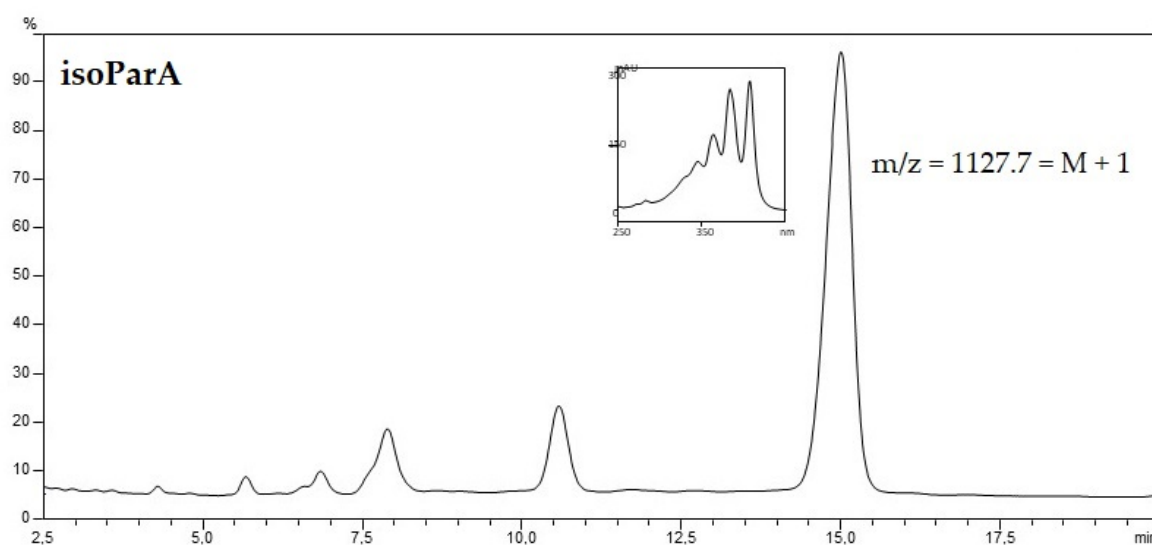

**HPLC-DAD-ESIMS chromatogram of isoPartricin A sample.**

Chromatographic conditions: column Luna 100 C18(2), (150 mm × 4.6 mm, 5 μm). Mobile phase composition: 38% acetonitrile/ 62% ammonium acetate buffer (5.5 mmol, pH = 4.5), v/v; at a flow rate of 1 mL/min; inj. volume = 10 μL. Detection at 378 nm, room temperature.

**Figure S1F**

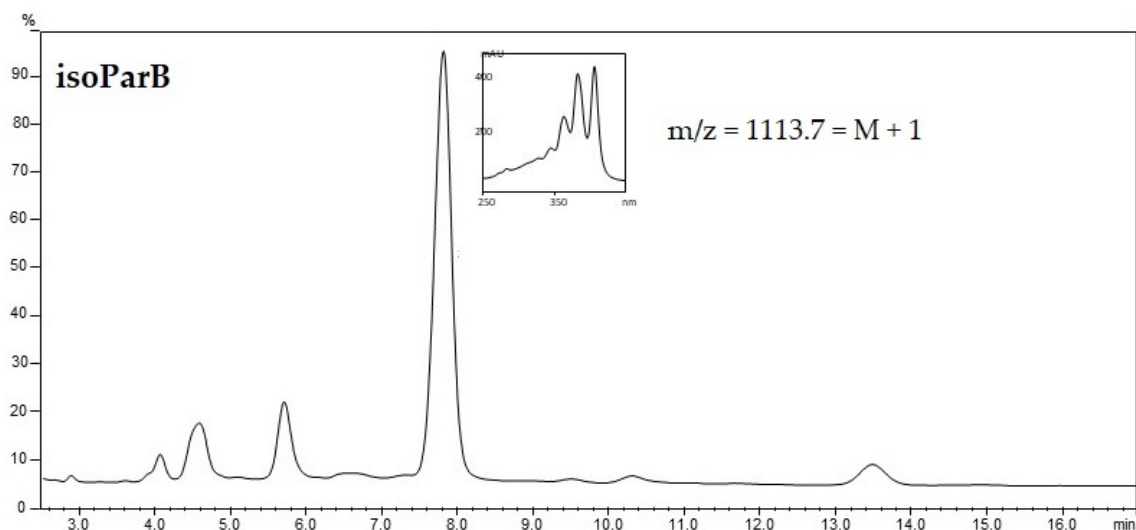

**HPLC-DAD-ESIMS chromatogram of isoPartricin B sample**

Chromatographic conditions: column Luna 100 C18(2), (150 mm × 4.6 mm, 5 μm). Mobile phase composition: 38% acetonitrile/ 62% ammonium acetate buffer (5.5 mmol, pH = 4.5), v/v; at a flow rate of 1 mL/min; inj. volume = 10 μL. Detection at 378 nm, room temperature.

**Figures S2A-F.**  $^1\text{H}$  NMR spectra of CndD, ParA, ParB, isoCndD, isoParA and isoParB

**Figure S1A**

$^1\text{H}$  spectrum CndD

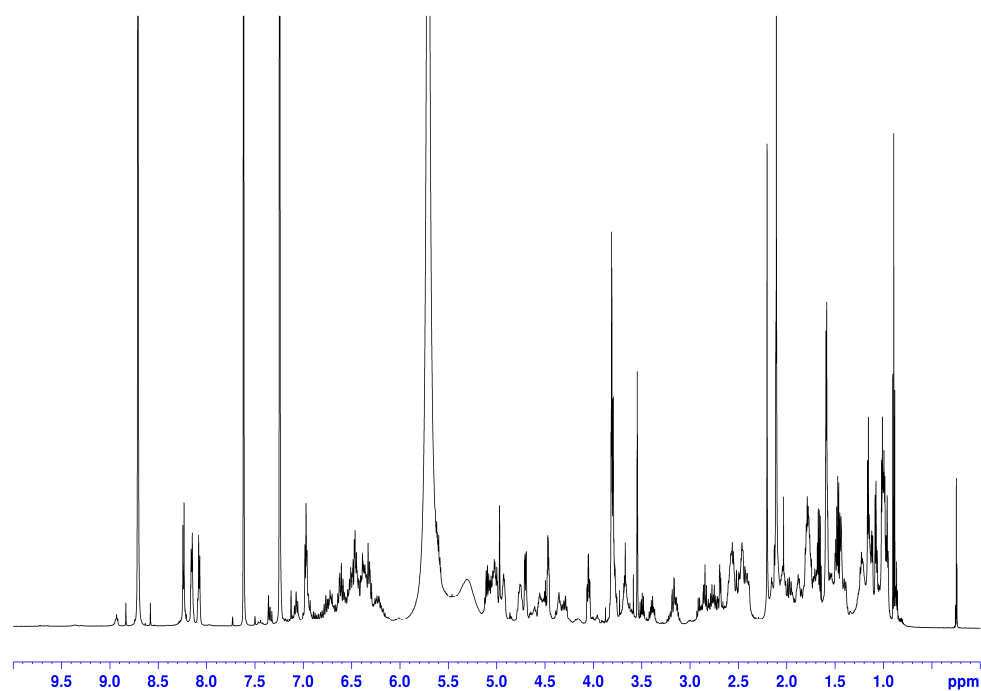

**Figure S2B**

$^1\text{H}$  NMR ParA

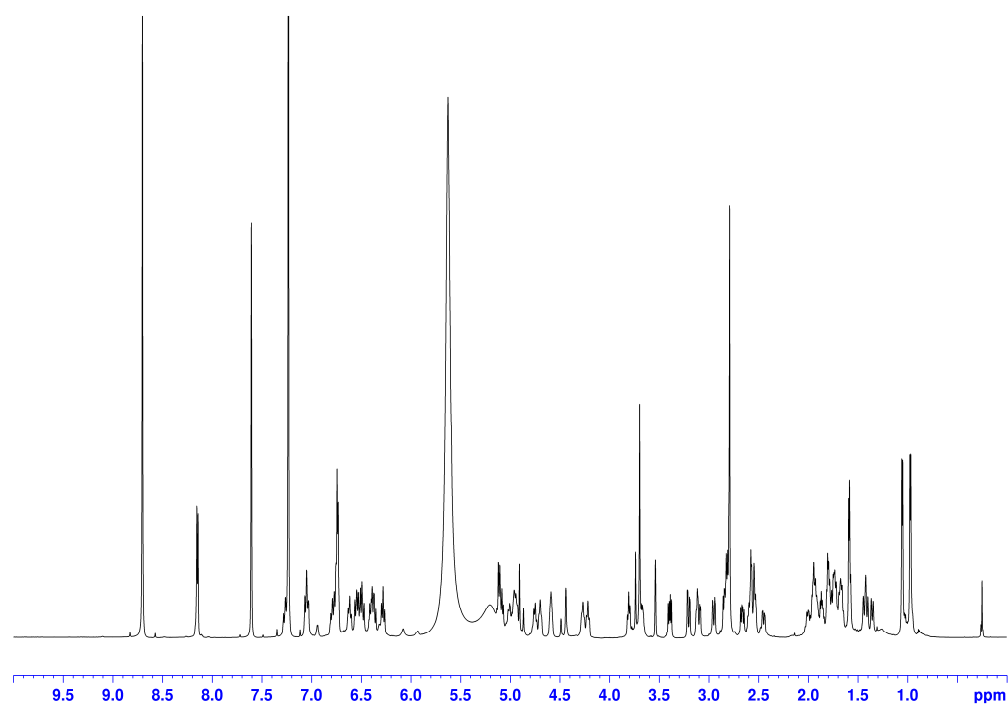

**Figure S2C**

$^1\text{H}$  NMR ParB

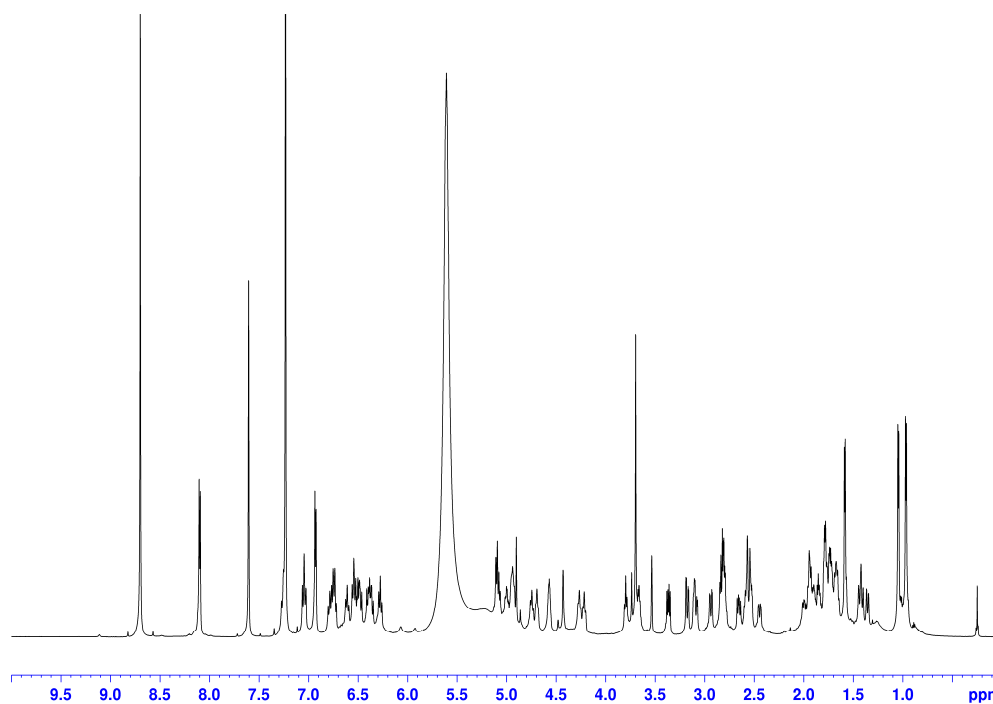

**Figure S2D**

$^1\text{H}$  NMR isoCndD

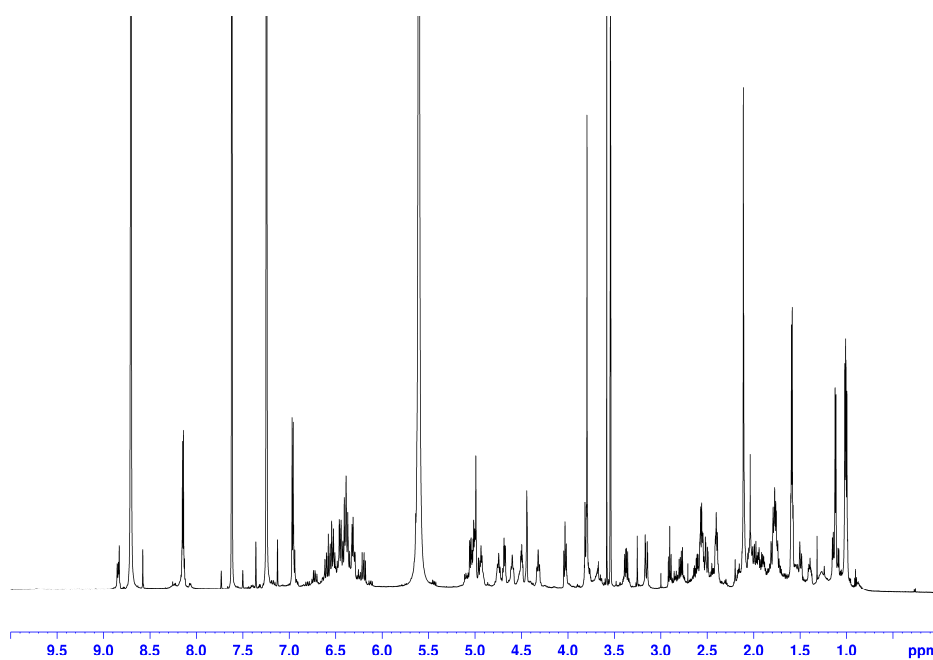

**Figure S2E**

$^1\text{H}$  NMR isoParA

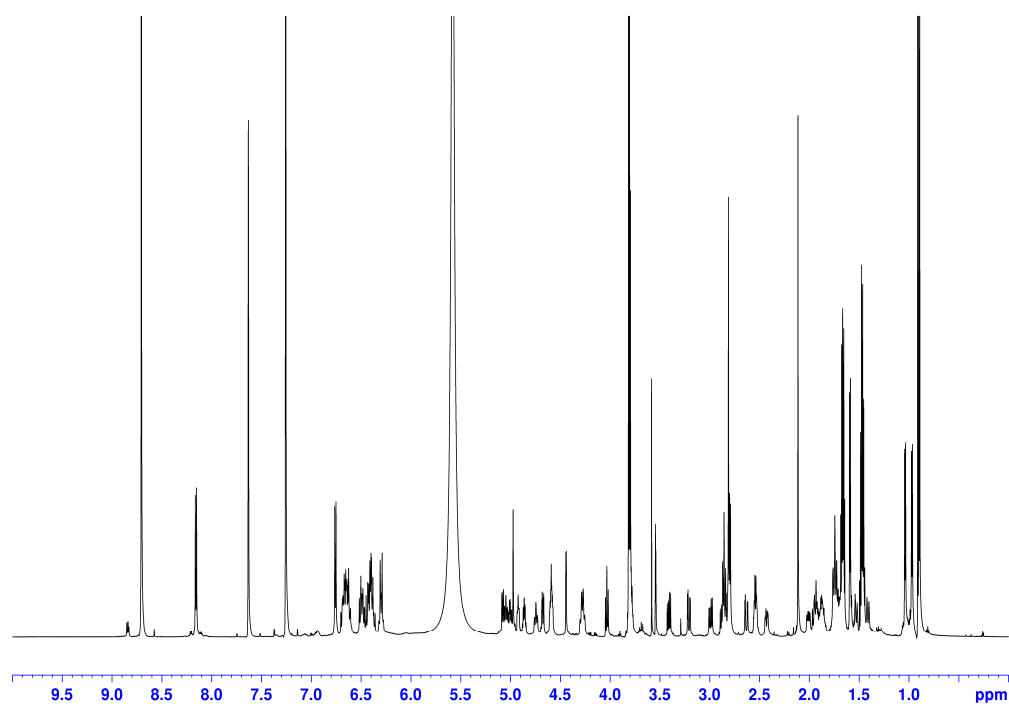

**Figure S2F**

$^1\text{H}$  NMR isoParB

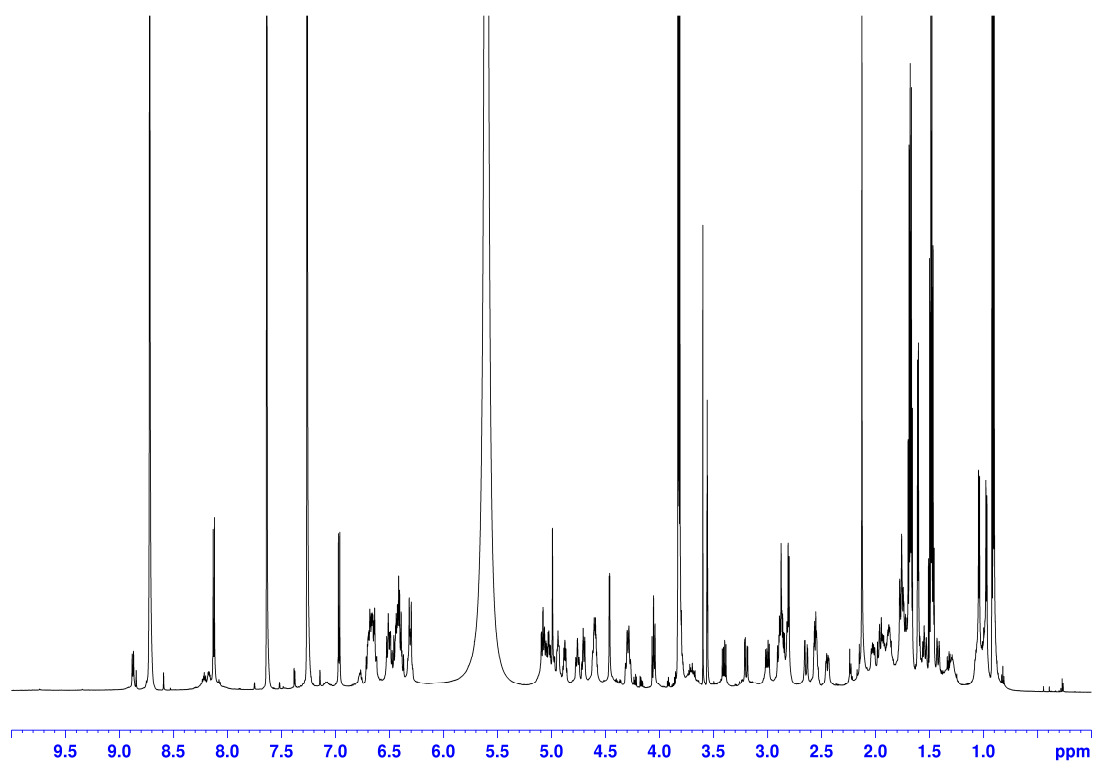

**Figures S3A-F.** Fragments of 2D DOF-COSY  $^1\text{H}$  NMR spectra of CndD, ParA, ParB and their *all-trans* isomers

**Figure S3A**

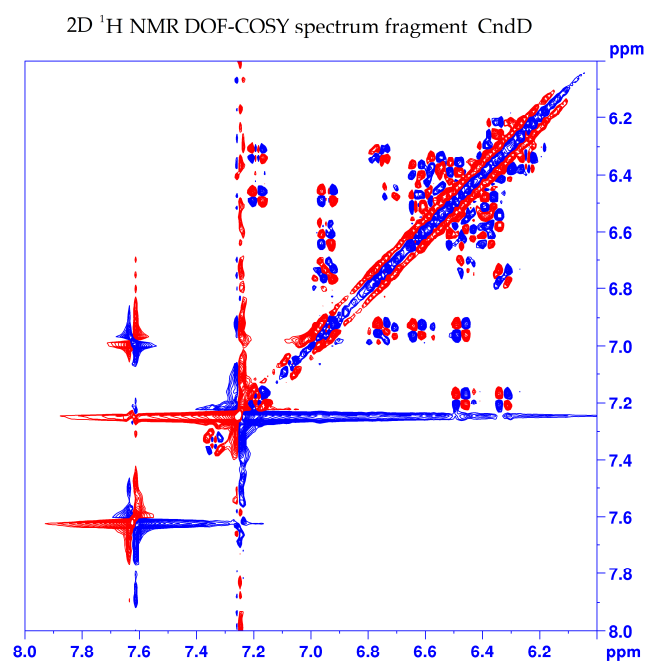

**Figure S3B**

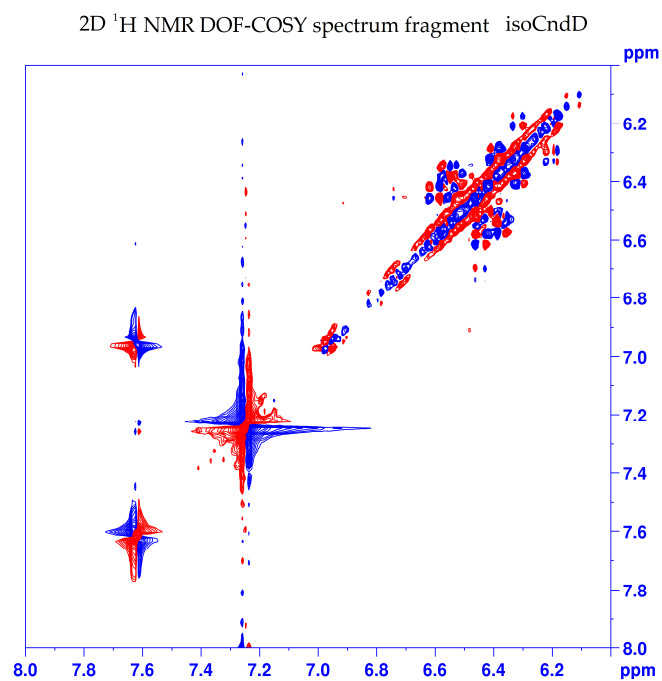

**Figure S3C**

2D  $^1\text{H}$  NMR DOF-COSY spectrum fragment ParA

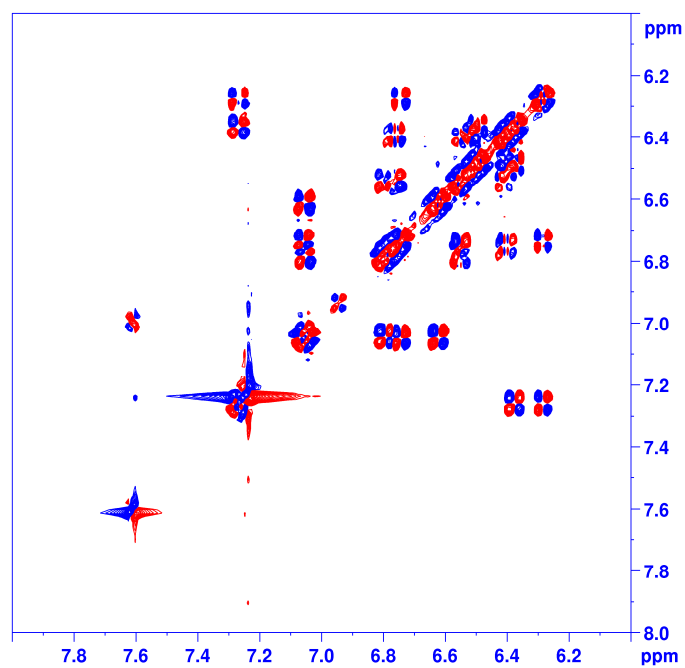

**Figure S3D**

2D  $^1\text{H}$  NMR DOF-COSY spectrum fragment isoParA

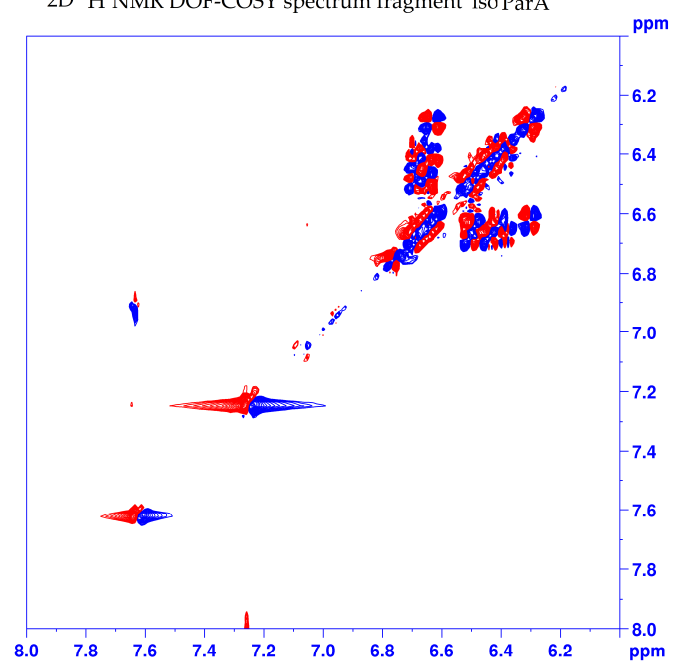



**Figure S3E**

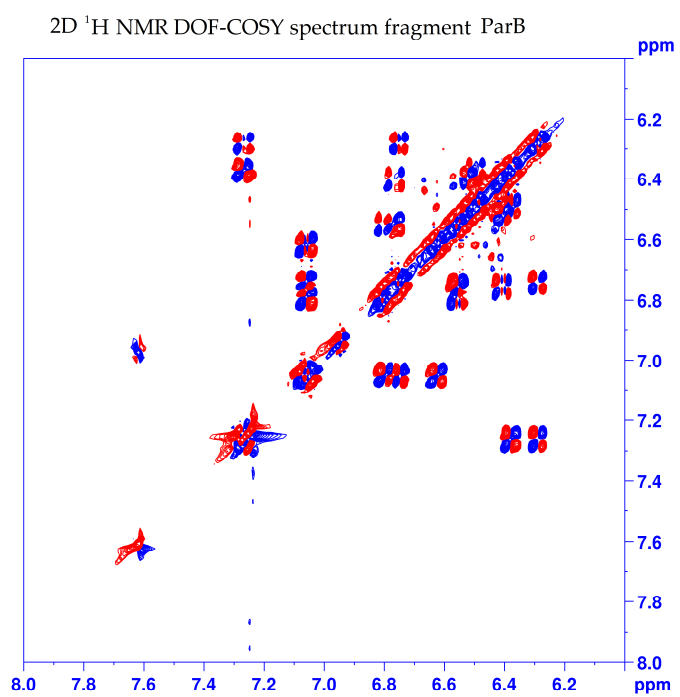

**Figure S3F**

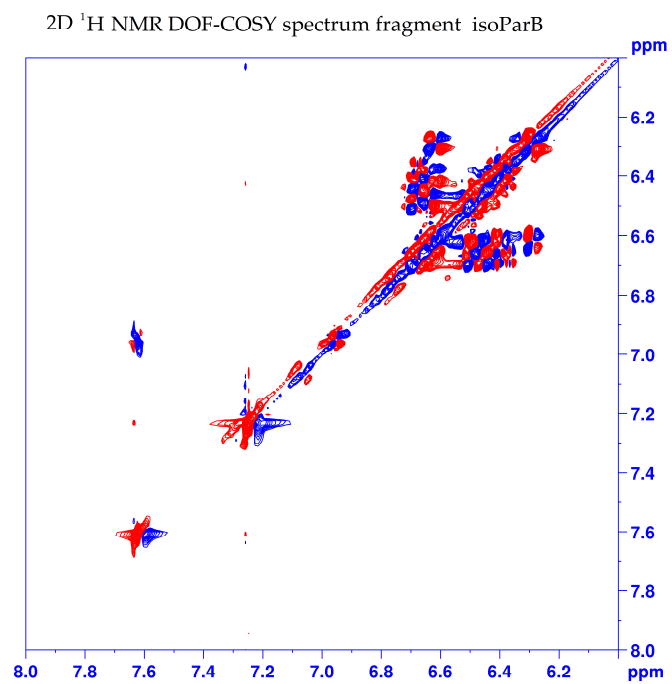

**Figure S4.** Structures of the AHM/sterol complexes, corresponding to the closer (1: 5-6 Å) and further (2: 7-8 Å) minima of the free energy profiles, obtained by cluster analysis of the resulting US trajectories.

| Chol    |                                                                                    |                                                                                    | Erg                                                                                  |                                                                                      |                                                                                     |
|---------|------------------------------------------------------------------------------------|------------------------------------------------------------------------------------|--------------------------------------------------------------------------------------|--------------------------------------------------------------------------------------|-------------------------------------------------------------------------------------|
| 1       |                                                                                    | 2                                                                                  | 1                                                                                    | 2                                                                                    |                                                                                     |
| isoCndD |   |   |   |   |  |
|         |  |  |  |  |                                                                                     |

|         | Chol                                                                               |                                                                                   |                                                                                    | Erg                                                                                  |                                                                                     |
|---------|------------------------------------------------------------------------------------|-----------------------------------------------------------------------------------|------------------------------------------------------------------------------------|--------------------------------------------------------------------------------------|-------------------------------------------------------------------------------------|
|         | 1                                                                                  | 2                                                                                 |                                                                                    | 1                                                                                    | 2                                                                                   |
| isoParA | 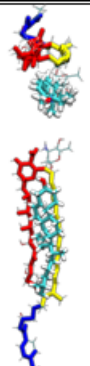  |  |  |   |  |
| ParA    |  |                                                                                   |                                                                                    |  |                                                                                     |

| Chol    |                                                                                    |                                                                                    |                                                                                     | Erg                                                                                  |                                                                                     |                                                                                     |  |
|---------|------------------------------------------------------------------------------------|------------------------------------------------------------------------------------|-------------------------------------------------------------------------------------|--------------------------------------------------------------------------------------|-------------------------------------------------------------------------------------|-------------------------------------------------------------------------------------|--|
| 1       |                                                                                    | 2                                                                                  |                                                                                     | 1                                                                                    | 2                                                                                   |                                                                                     |  |
| isoParB |   |                                                                                    |                                                                                     |   |  |  |  |
| ParB    |  |  |  |  |                                                                                     |                                                                                     |  |
